# Supplementary material for: miR-26a regulates extracellular vesicle secretion from prostate cancer cells via targeting SHC4, PFDN4, and CHORDC1
Source: PubMed Central journal article supplement — Sci Adv. 2020 Apr 29;6(18):eaay3051. doi: 10.1126/sciadv.aay3051 (PMC7190312; doi:10.1126/sciadv.aay3051), 2020-04-29
Supplement: aay3051_SM.pdf [file aay3051_SM.pdf]

[advances.sciencemag.org/cgi/content/full/6/18/eaay3051/DC1](https://advances.sciencemag.org/cgi/content/full/6/18/eaay3051/DC1)

## Supplementary Materials for

### **miR-26a regulates extracellular vesicle secretion from prostate cancer cells via targeting SHC4, PFDN4, and CHORDC1**

Fumihiko Urabe, Nobuyoshi Kosaka\*, Yurika Sawa, Yusuke Yamamoto, Kagenori Ito, Tomofumi Yamamoto, Takahiro Kimura, Shin Egawa, Takahiro Ochiya

\*Corresponding author. Email: [nkosaka@tokyo-med.ac.jp](mailto:nkosaka@tokyo-med.ac.jp)

Published 29 April 2020, *Sci. Adv.* **6**, eaay3051 (2020)  
DOI: 10.1126/sciadv.aay3051

#### **This PDF file includes:**

Figs. S1 to S7

## Figure S1.

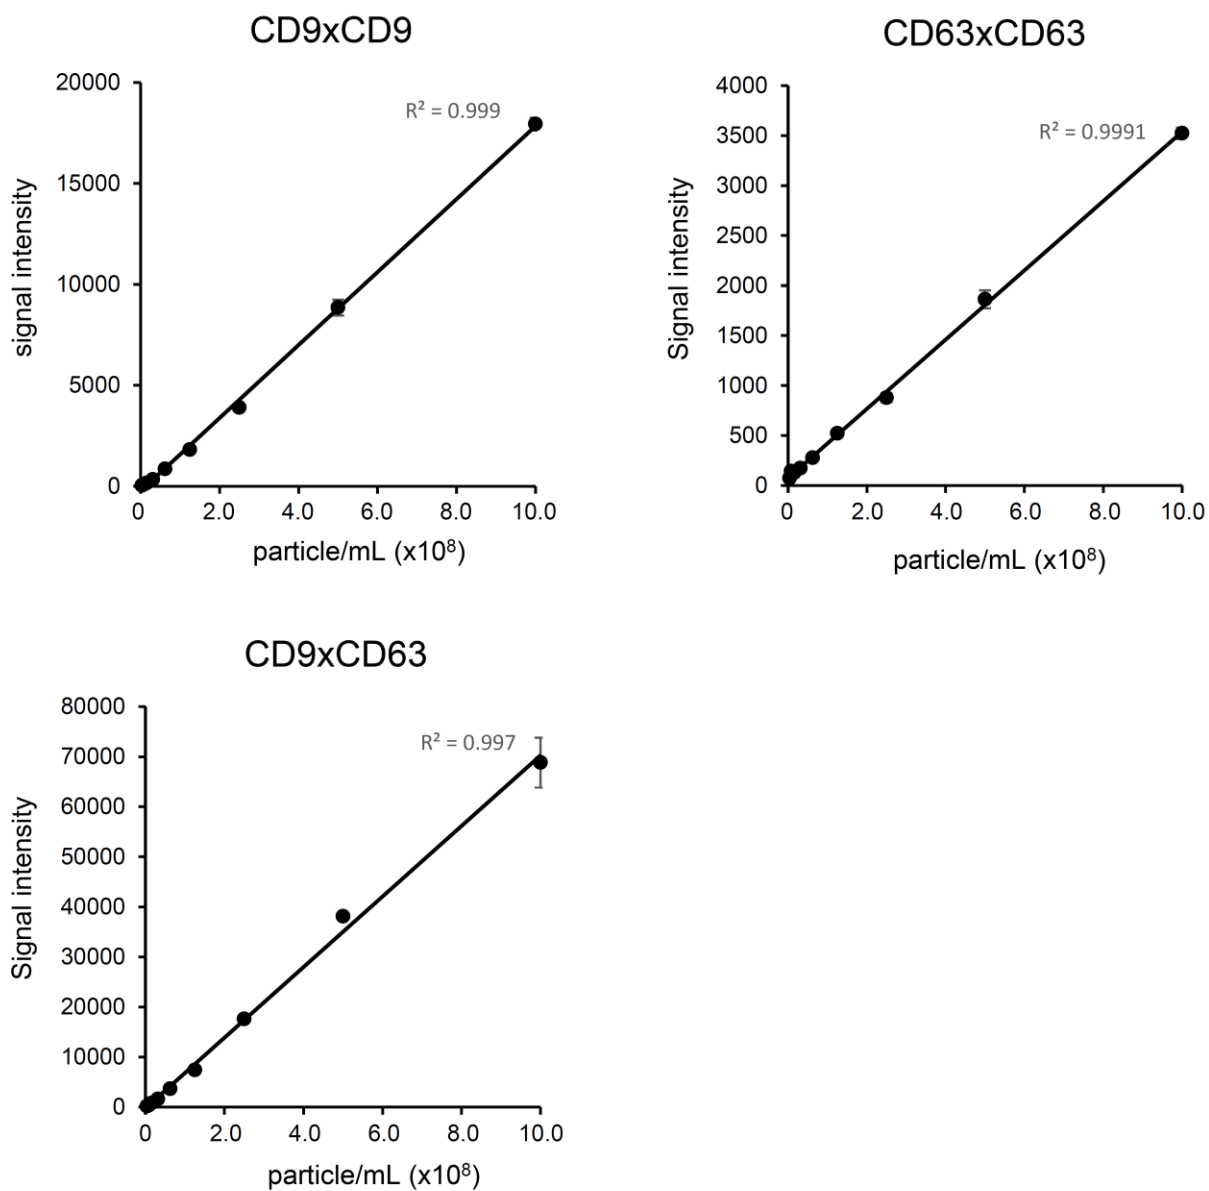

### Fig. S1. Correlation between ExoScreen and NTA

Correlation between ExoScreen measurements for CD9 positive extracellular vesicles (EVs), CD63 positive EVs, or CD9/CD63 double positive EVs and particle number of EVs in a dilution series. Particle number was measured via NTA. EVs were collected from PC3M cells. The values are the mean  $\pm$  SE ( $n = 3$ ).

**Figure S2.**

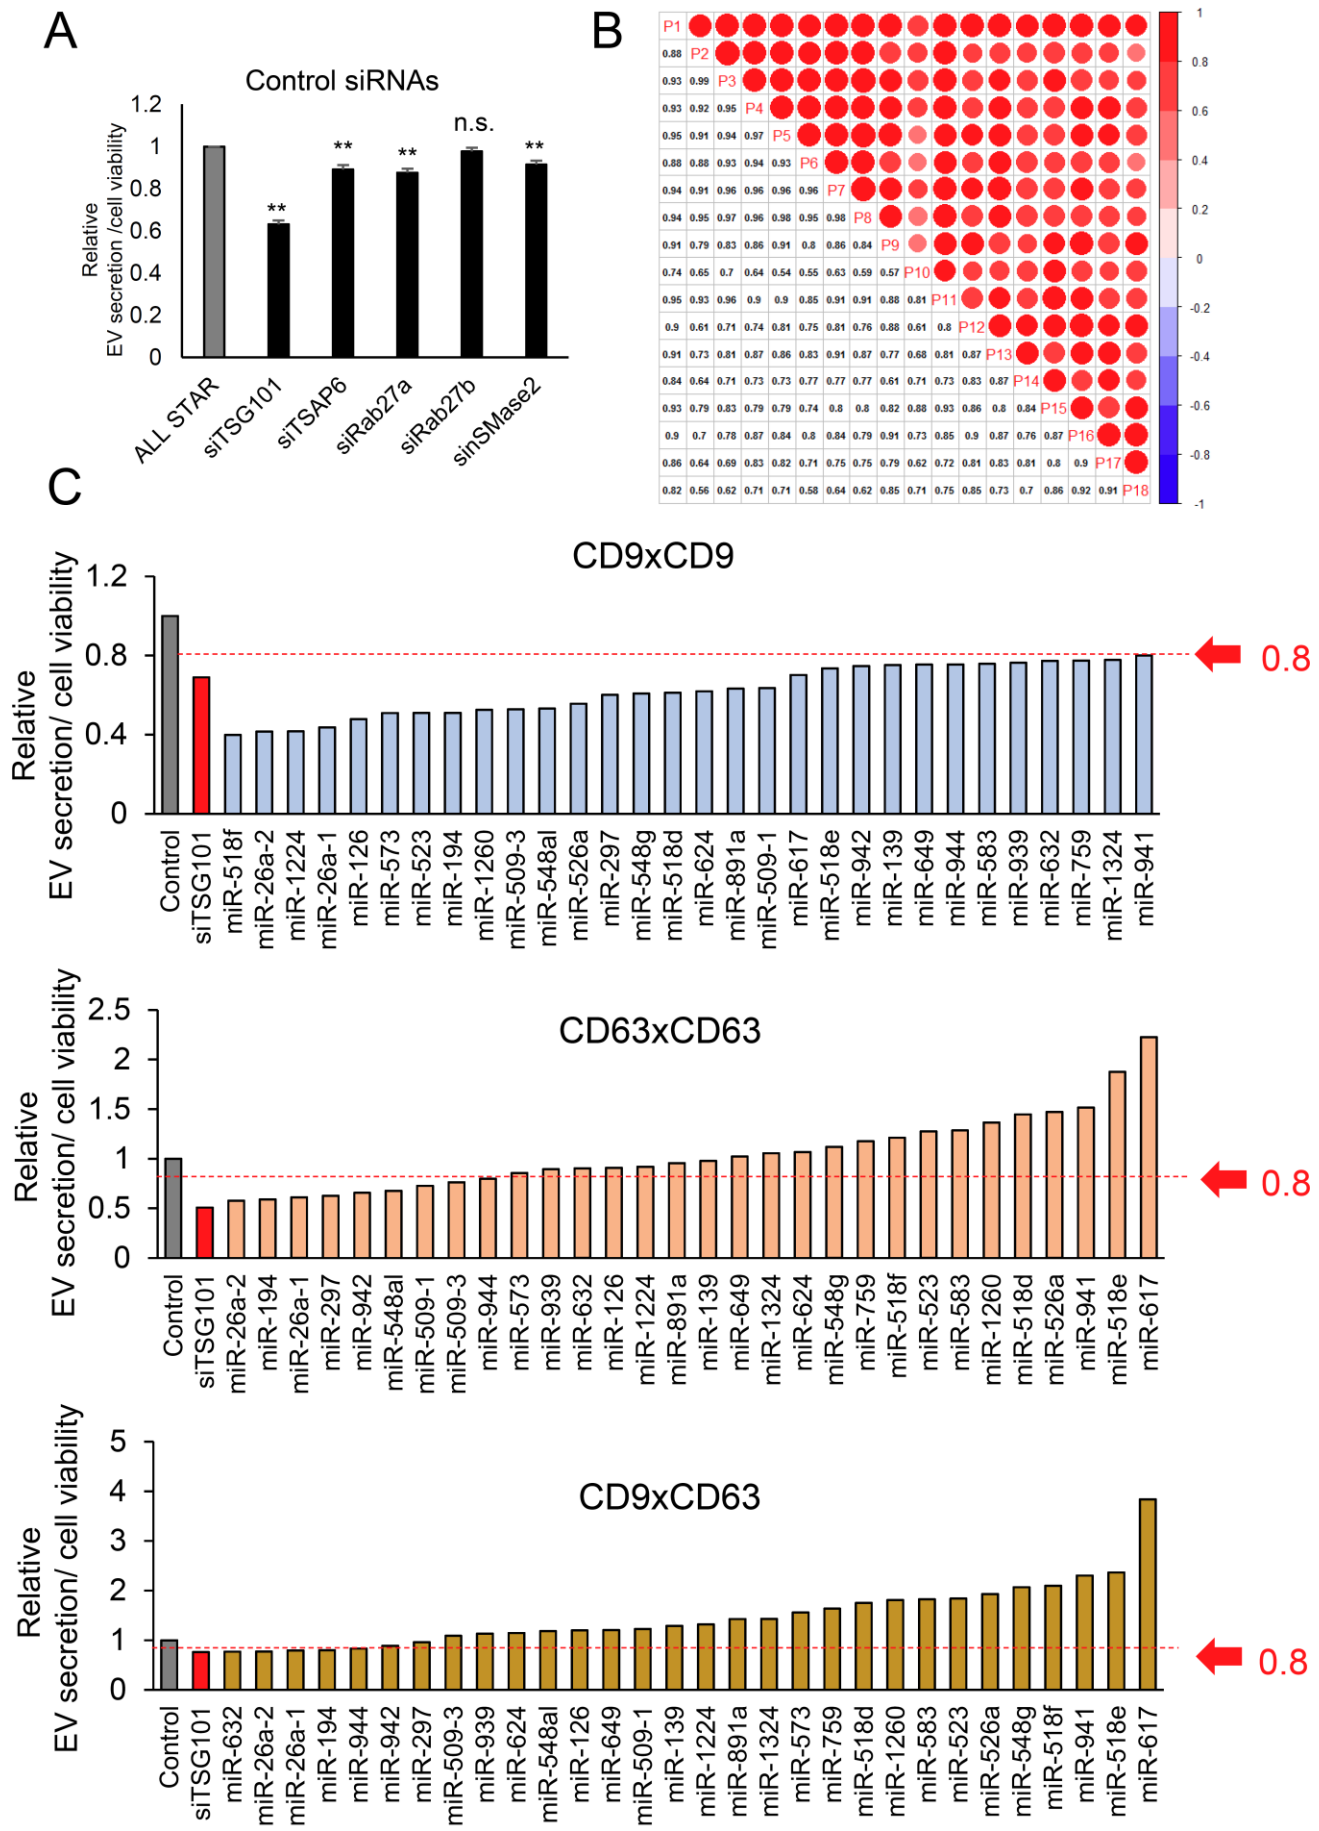

**Fig. S2. Results of screening to select miRNAs regulating EV secretion**

(A) The average of EV secretion from the controls in the 1st screening. (B) Correlation matrix between the controls: positive correlations are shown in red, and negative correlations are shown in blue. The values are the mean  $\pm$  SE (n = 18). \*\*, p < 0.01; and n.s., not significant. (C) The results of the screening from 30 candidate miRNAs. The effect of 30 miRNAs and nonspecific miRNA mimic (control) on the secretion of EVs and cell viability. The secretion of EV was evaluated by ExoScreen, and the cell viability was measured using the MTS assay.

**Figure S3.**

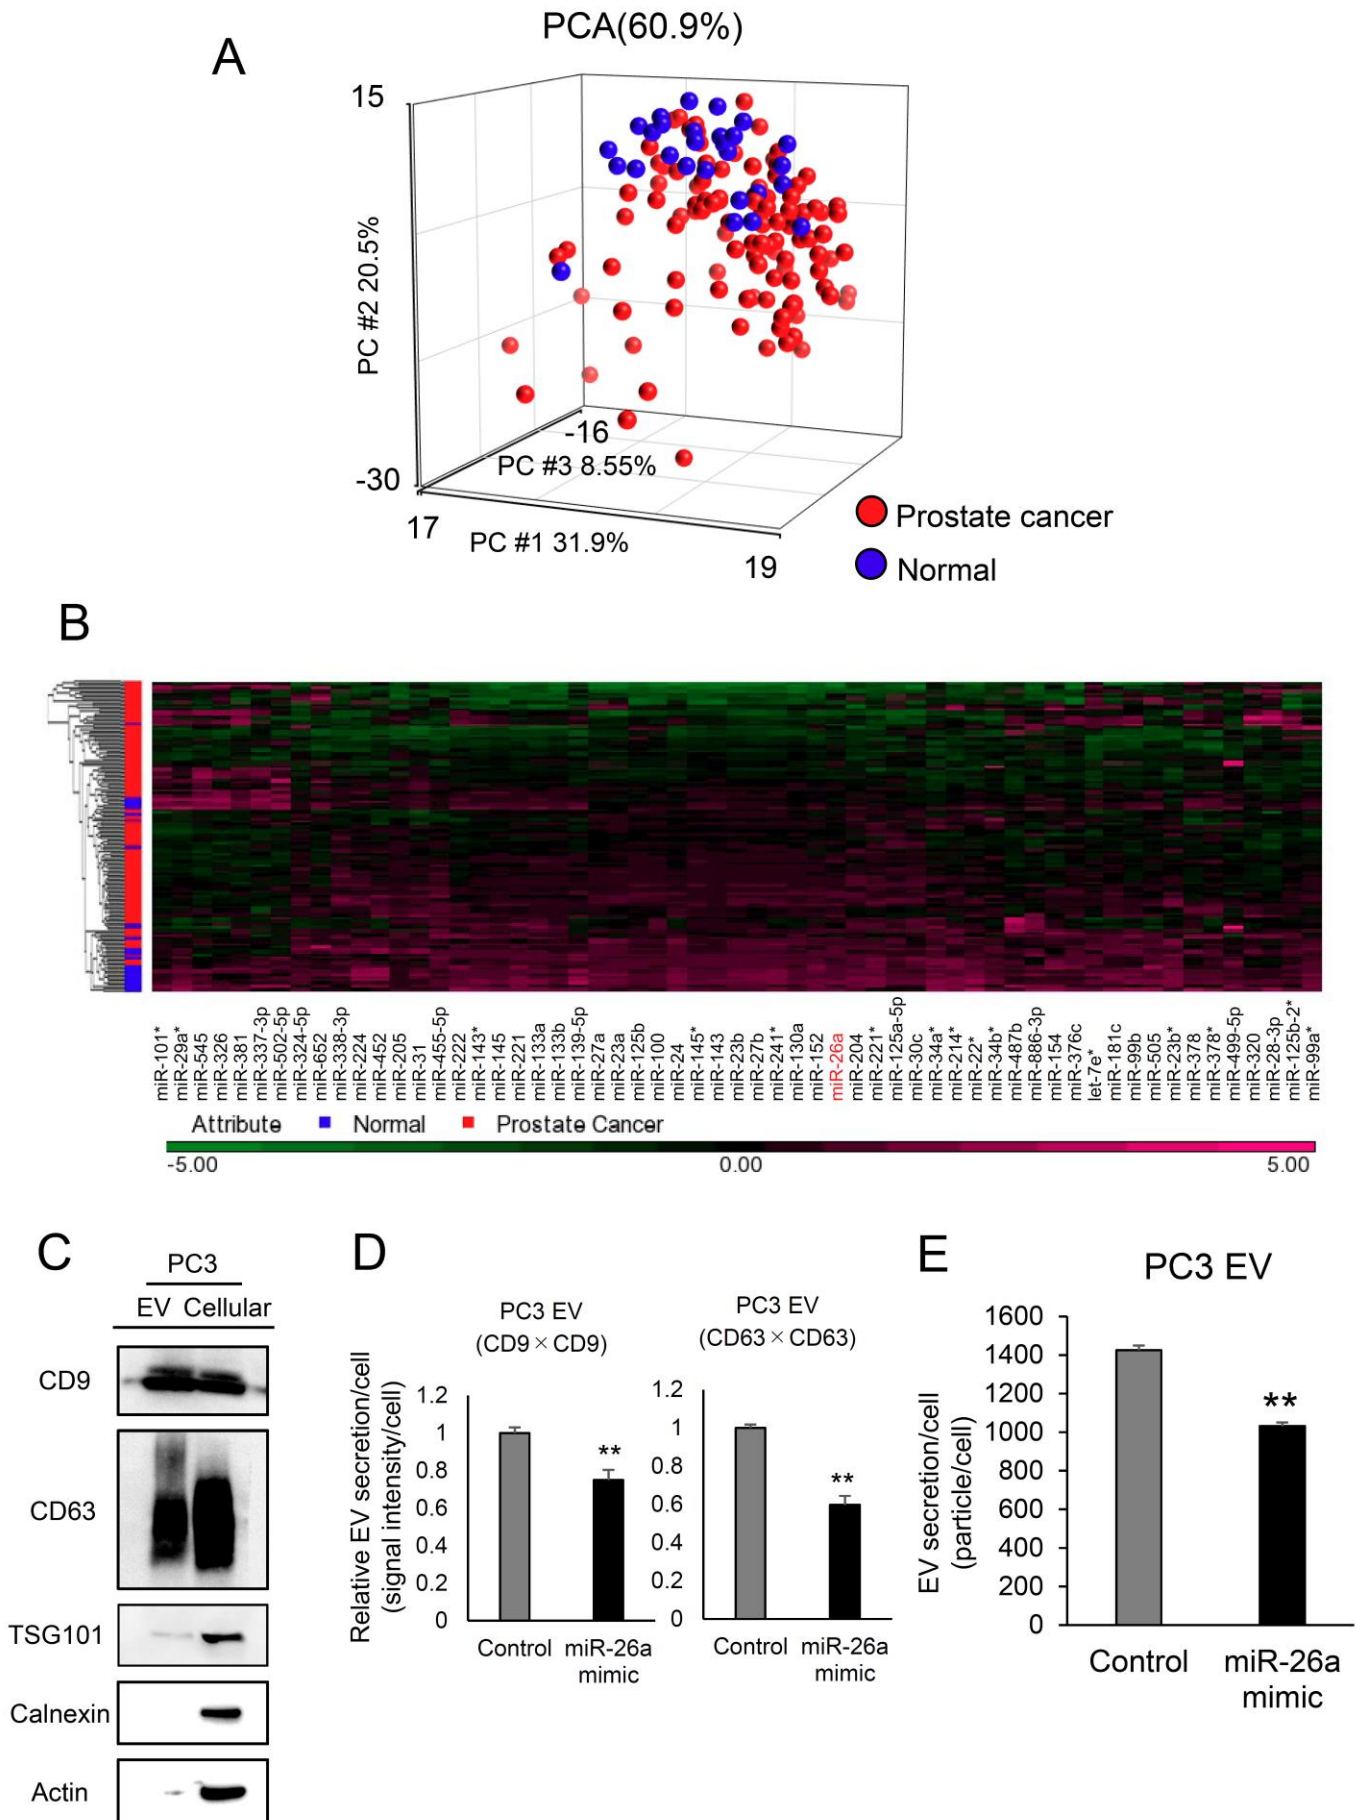

**Fig. S3. Analysis of expression of miR-26a in prostate cancer samples**

(A) A principal component analysis (PCA) map for 99 prostate cancer (PCa) tissues and 28 normal adjacent benign prostate tissues with 373 miRNAs. (B) Heat map showing the differences in 59 miRNAs whose expression levels were repressed > 1.25-fold in PCa tissue relative to normal adjacent benign prostate tissue and p-value < 0.001. (C) Immunoblot analysis of the conventional EV markers. A 1 µg sample of EVs and a 10 µg sample of cell lysate from PC3 cells were loaded into each lane. (D) The effect of the miR-26a mimic on EV secretion per PC3 cell. The secretion of EVs per cell was evaluated by the signal intensity of ExoScreen per cell. The values are depicted as the fold-change relative to the nonspecific miRNA mimic (control). The values are the mean ± SE (n = 3). \*\*, p < 0.01. (E) The effect of the miR-26a mimic on EV secretion per PC3 cell. The amount of EV secreted per cell was evaluated using a nanoparticle tracking system. The values are the mean ± SE (n = 3). \*\*, p < 0.01.

## Figure S4.

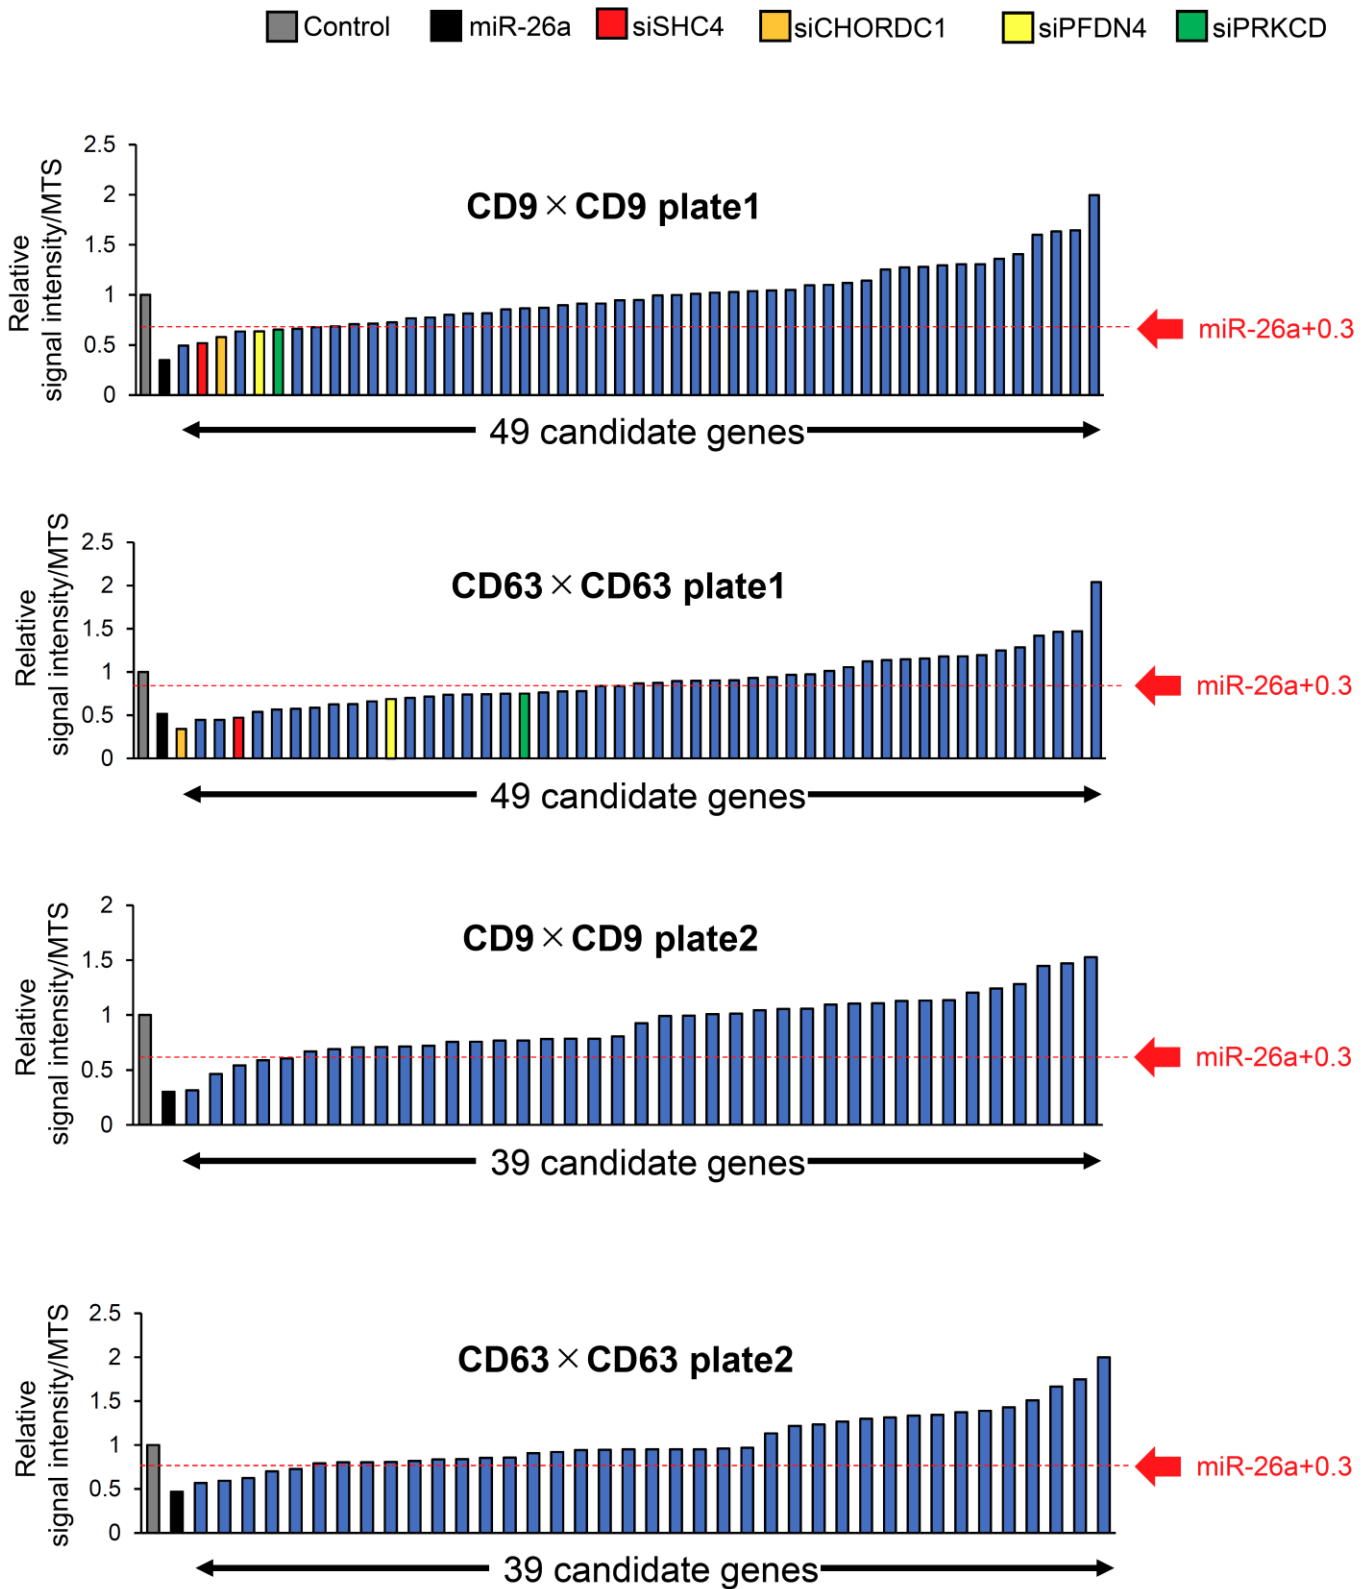

**Fig. S4. Results of screening to select candidate genes regulating EV secretion**

The effect of candidate gene siRNAs and negative control siRNA (control) on the secretion of EVs and cell viability. The secretion of EV was evaluated by ExoScreen, and the cell viability was measured using the MTS assay. A total of 88 candidate genes were separated into two plates, plate 1 and plate 2.

**Figure S5.**

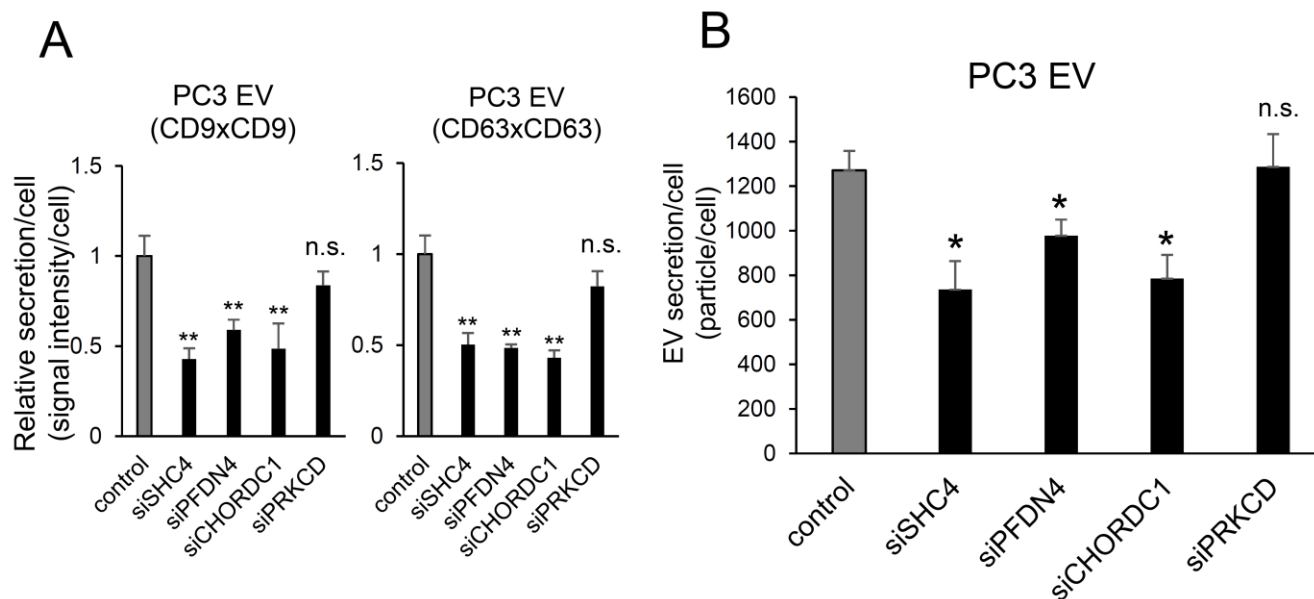

**Fig. S5. Effect of siRNAs against the candidate genes on EV secretion**

(A) The secretion of EVs was evaluated by the signal intensity of ExoScreen. The values are depicted as the fold-change relative to the nonspecific miRNA mimic (control). (B) The particle number of EVs was measured using a nanoparticle tracking system. The values are the mean  $\pm$  SE ( $n = 3$ ). \*,  $p < 0.05$ ; and n.s., not significant.



## Figure S6.

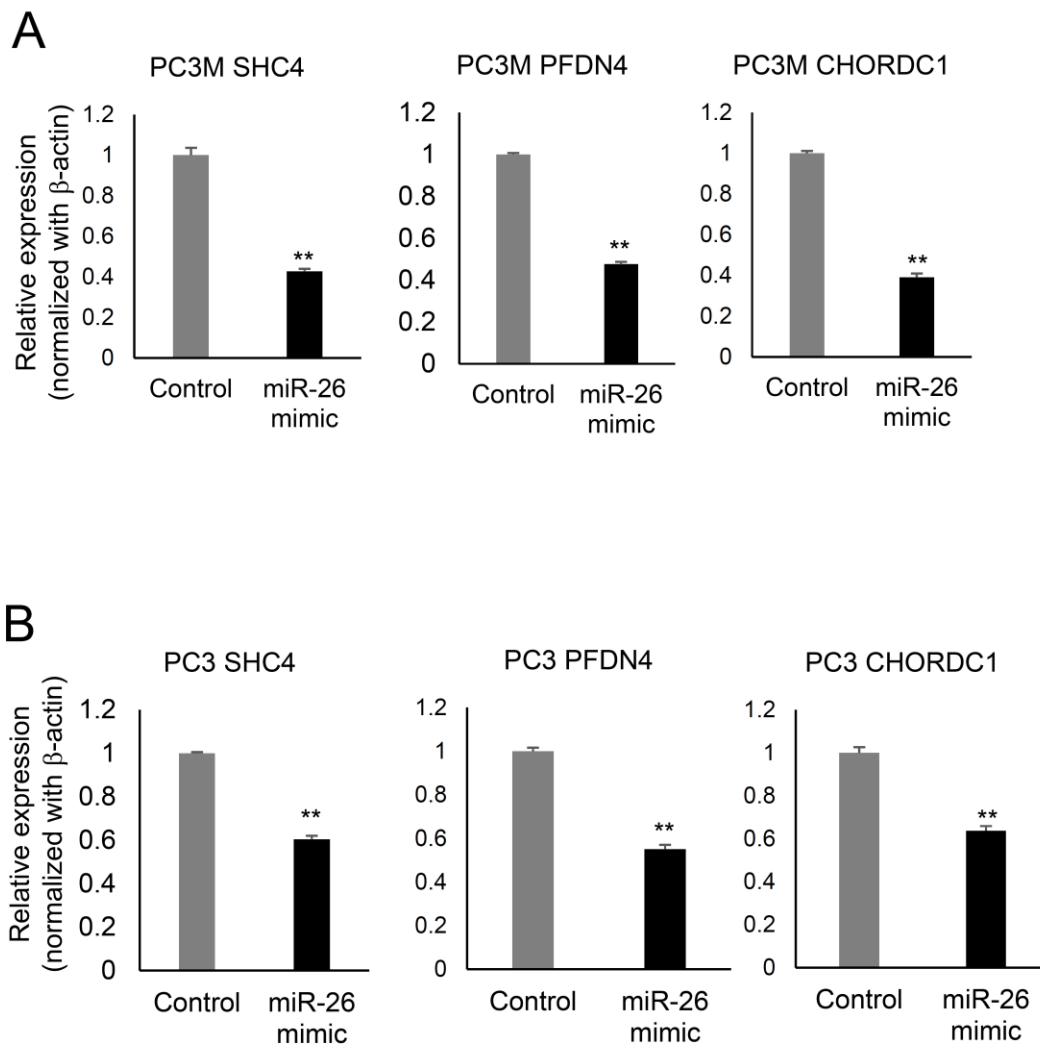

**Fig. S6. Effect of miR-26a on the expression level of target genes**

(A) The effect of miR-26a on the expression level of target genes in PC3M cells. The values are depicted as the fold-change relative to the nonspecific miRNA mimic (control). The values are the mean  $\pm$  SE (n = 3). \*\*, p < 0.01.

(B) The effect of miR-26a on the expression level of target genes in PC3 cells. The values are depicted as the fold-change relative to the nonspecific miRNA mimic (control). The values are the mean  $\pm$  SE (n = 3). \*\*, p < 0.01.

**Figure S7.**

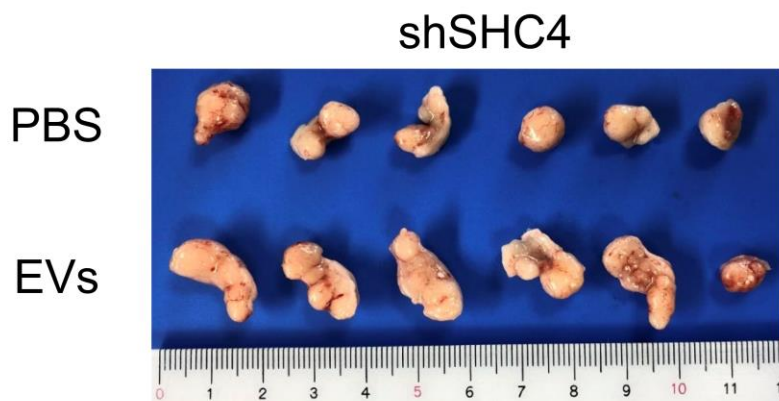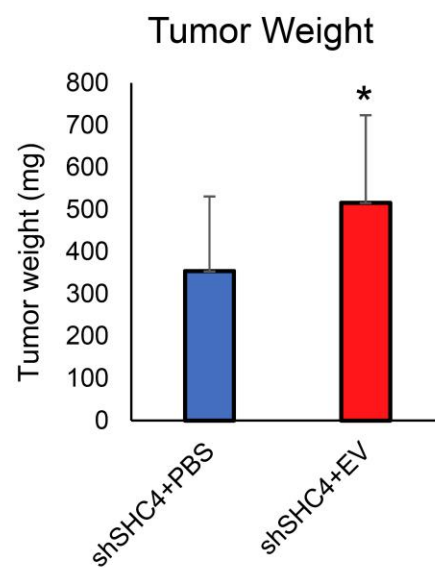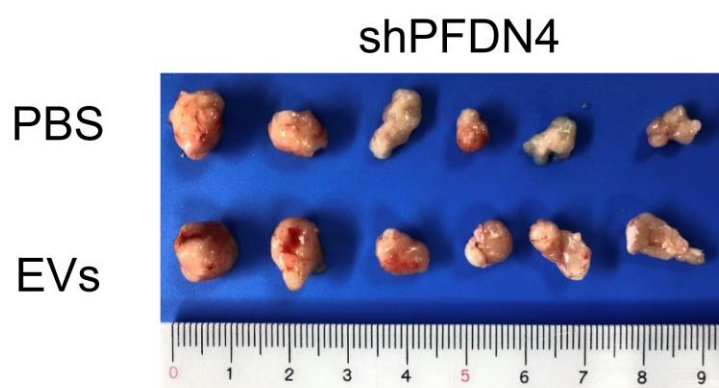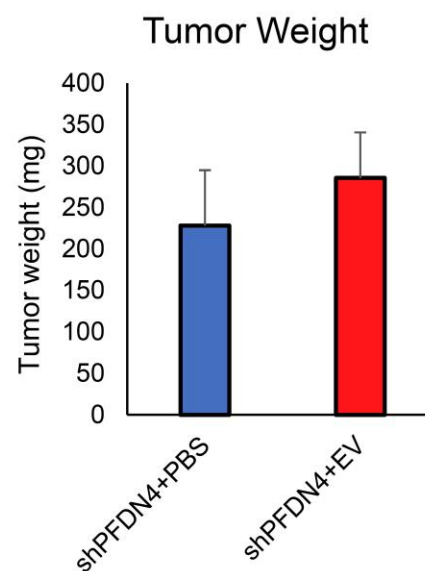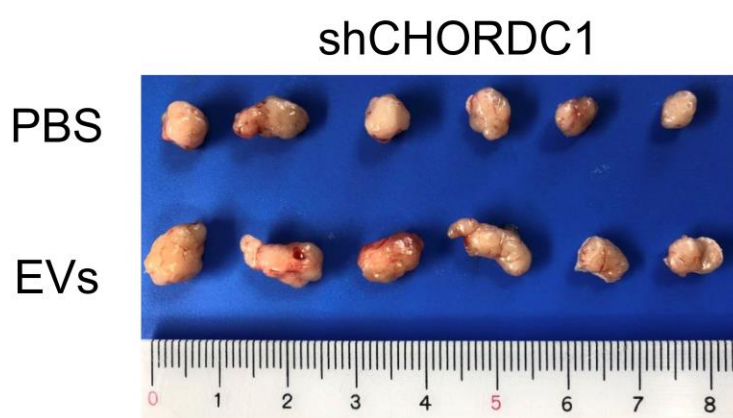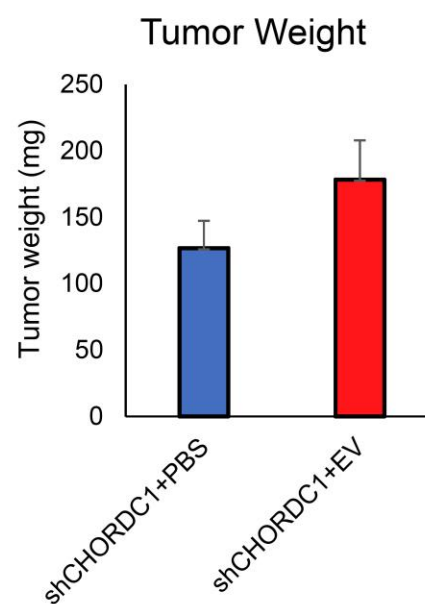

**Fig. S7. EVs partially rescued the tumor size and weight**

The xenografts from nude mice injected with PBS or EVs. The tumor weights in nude mice at 31 days were determined. The values are the mean  $\pm$  SE (n = 6). \*, p < 0.05. (Photo credit: Fumihiko Urabe, The Jikei University School of Medicine)
